# Supplementary material
Source: PubMed Central journal article supplement (PMC6761597)
Supplement: Supp_Fig7.pdf [file Supp_Fig7.pdf]

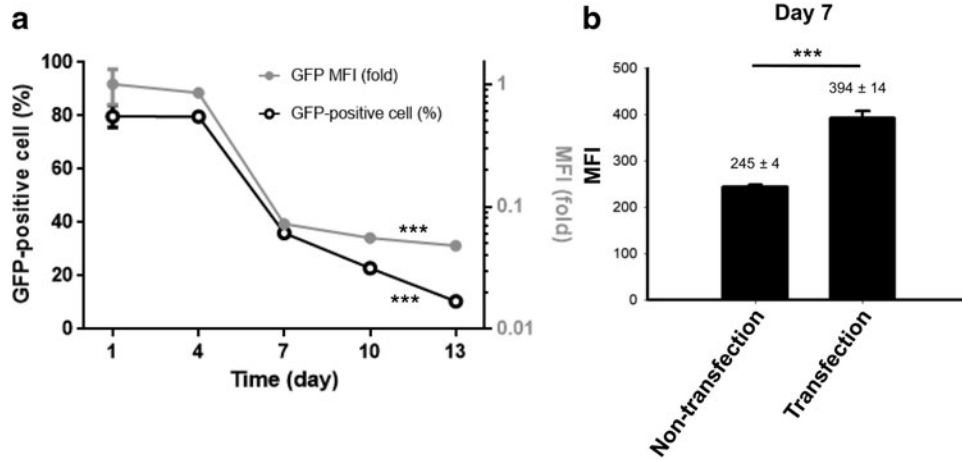

**SUPPLEMENTARY FIG. S7.** The *in vitro* GFP expression of MSCs transfected by calcium phosphate overtime. The experimental design for the *in vitro* GFP expression is shown in Fig. 5a. In brief, C57BL/6J MSCs were transfected with pMaxGFP by calcium phosphate, and 2 days later, the cells were seeded in six-well plates ( $2 \times 10^4$  cells/well). The cells were harvested for flow cytometry analysis every 3 days. **(a)** Both data of GFP-positive cells and MFI over time are shown here ( $n=3$ ). The data of MFI were normalized to the nontransfection control of each day first and then normalized to day 1. **(b)** The MFI values of the nontransfection control and transfected MSCs on day 7 are shown ( $n=3$ ). The values above bars are displayed as mean  $\pm$  SD for each group. The data were analyzed by one-way ANOVA **(a)** or unpaired Student's *t* test **(b)**. \*\*\* $p < 0.001$ . MFI, mean fluorescence intensity.
