# Supplementary material
Source: PubMed Central journal article supplement (PMC6761597)
Supplement: Supp_Figs5-6.pdf [file Supp_Figs5-6.pdf]

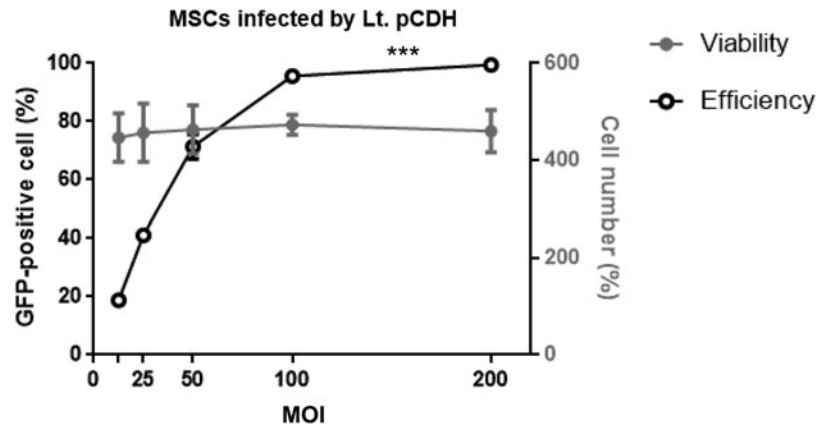

**SUPPLEMENTARY FIG. S5.** The transduction efficiency and cell viability of MSCs infected by the lentivirus at different MOI. C57BL/6J MSCs were infected with the GFP-expressing lentivirus (Lt.pCDH) at different MOI (12.5, 25, 50, 100, 200) as described in the Materials and Methods section at day 0 and then harvested at day 3 for analyzing transfection efficiency (calculation by GFP-positive cells) ( $n=3$ ) and the cell viability (calculation by cell number; shown as a percentage) ( $n=3$ ). The data were analyzed by one-way ANOVA. \*\*\*,  $p < 0.001$ . MOI, multiplicity of infection.

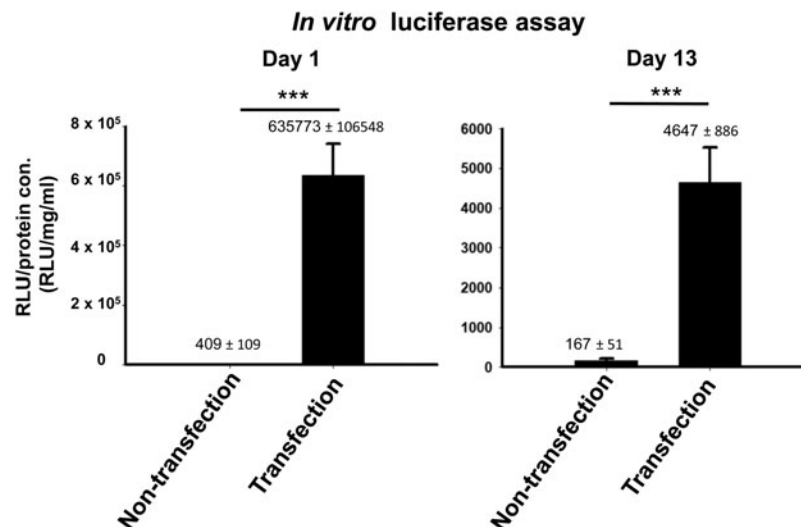

**SUPPLEMENTARY FIG. S6.** The *in vitro* luciferase assay of MSCs transfected by calcium phosphate at day 1 and 13. The experimental design for the *in vitro* luciferase activity is shown in Fig. 5a. In brief, C57BL/6J MSCs were transfected with 40  $\mu$ g pCMV-Luc by calcium phosphate, and 2 days later, the cells were seeded in six-well plates ( $2 \times 10^4$  cells/well). The nontransfection control was incubated in serum-free medium instead of the 2%-serum medium with DNA-calcium phosphate transfection solution. The *in vitro* luciferase activities and protein concentrations were monitored every 3 days as described in the Materials and Methods section; data at day 1 and 13 are shown here. The luciferase activity was normalized by total protein concentration for comparison. The values above bars are displayed as mean  $\pm$  SD for each group. The data were analyzed by unpaired Student's *t* test. \*\*\*,  $p < 0.001$ . SD, standard deviation.
